# Supplementary material
Source: Springer Nature journal article supplement (https://www.springermedizin.de/resource/supplementary/12916_2010_422_MOESM19_ESM.pdf/9599922)

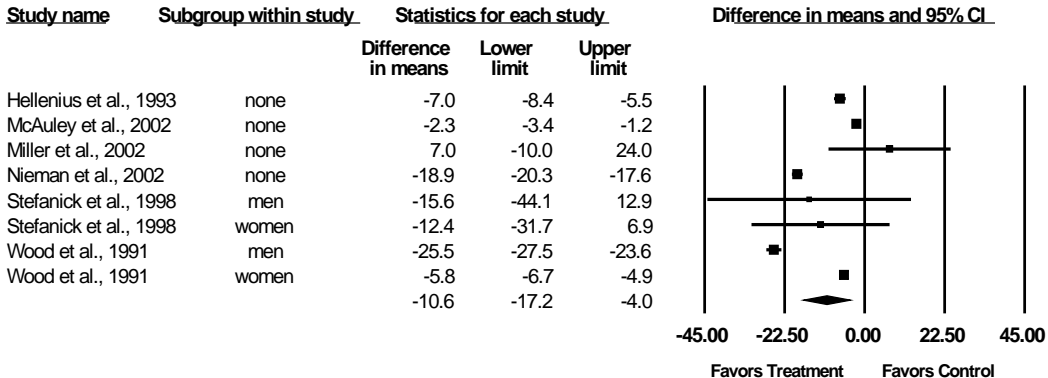

Supplement: MOESM19 [file 9599922]
